1 **Title:** Adaptation in a fibronectin binding autolysin of *Staphylococcus saprophyticus*

2 **Authors:** Tatum D. Mortimer<sup>1,2</sup>, Douglas S. Annis<sup>3</sup>, Mary B. O'Neill<sup>1,4</sup>, Lindsey L.  
3 Bohr<sup>1,2</sup>, Tracy M. Smith<sup>1,5</sup>, Hendrik N. Poinar<sup>6,7,8,9</sup>, Deane F. Mosher<sup>3</sup>, Caitlin S.  
4 Pepperell<sup>1,5</sup>

5 **Affiliations:**

6 <sup>1</sup>Department of Medical Microbiology and Immunology, School of Medicine and Public  
7 Health, University of Wisconsin-Madison, Madison, United States

8 <sup>2</sup>Microbiology Doctoral Training Program, University of Wisconsin-Madison, Madison,  
9 United States

10 <sup>3</sup>Department of Biomolecular Chemistry, School of Medicine and Public Health,  
11 University of Wisconsin-Madison, Madison, WI, USA

12 <sup>4</sup>Laboratory of Genetics, University of Wisconsin-Madison, Madison, Wisconsin, United  
13 States

14 <sup>5</sup>Department of Medicine (Infectious Diseases), School of Medicine and Public Health,  
15 University of Wisconsin-Madison, Madison, United States

16 <sup>6</sup>McMaster Ancient DNA Centre, Department of Anthropology, McMaster University,  
17 Hamilton, Canada

18 <sup>7</sup>Department of Biology, McMaster University, Hamilton, Canada

19 <sup>8</sup>Michael G. DeGrootte Institute for Infectious Disease Research, McMaster University,  
20 Hamilton,  
21 Canada

22 <sup>9</sup>Humans and the Microbiome Program, Canadian Institute for Advanced Research,  
23 Toronto, Canada

24

25 **Abstract:**

26 Human-pathogenic bacteria are found in a variety of niches, including free-living,  
27 zoonotic, and microbiome environments. Identifying bacterial adaptations that enable  
28 invasive disease is an important means of gaining insight into the molecular basis of  
29 pathogenesis and understanding pathogen emergence. *Staphylococcus saprophyticus*,  
30 a leading cause of urinary tract infections, can be found in the environment, food,  
31 animals, and the human microbiome. We identified a selective sweep in the gene  
32 encoding the Aas adhesin, a key virulence factor that binds host fibronectin. We  
33 hypothesize that the mutation under selection (*aas\_2206A>C*) facilitates colonization of  
34 the urinary tract, an environment where bacteria are subject to strong shearing forces.  
35 The mutation appears to have enabled emergence and expansion of a human  
36 pathogenic lineage of *S. saprophyticus*. These results demonstrate the power of  
37 evolutionary genomic approaches in discovering the genetic basis of virulence and  
38 emphasize the pleiotropy and adaptability of bacteria occupying diverse niches.

39 **Importance:**

40 *Staphylococcus saprophyticus* is an important cause of urinary tract infections (UTI) in  
41 women, which are common, can be severe, and are associated with significant impacts  
42 to public health. In addition to being a cause of human UTI, *S. saprophyticus* can be  
43 found in the environment, in food, and associated with animals. After discovering that  
44 UTI strains of *S. saprophyticus* are for the most part closely related to each other, we  
45 sought to determine whether these strains are specially adapted to cause disease in  
46 humans. We found evidence suggesting that a mutation in the gene *aas* is  
47 advantageous in the context of human infection. We hypothesize that the mutation  
48 allows *S. saprophyticus* to survive better in the human urinary tract. These results show  
49 how bacteria found in the environment can evolve to cause disease.

50

## 51 **Introduction.**

52 Urinary tract infections (UTI) are a global health problem of major significance, with an  
53 estimated annual incidence of 150-250 million and a lifetime risk of 50% among women  
54 (1–3). The associated costs to individuals and health care systems are substantial, with  
55 recent estimates from the United States numbering in the billions per year (4). UTIs are  
56 also associated with severe complications such as pyelonephritis, sepsis and premature  
57 labor (4). *Staphylococcus saprophyticus* is second only to *Escherichia coli* as a cause  
58 of UTI in reproductive aged women (5, 6).

59 *S. saprophyticus* can be found in diverse niches including the environment, foods,  
60 livestock, and as a pathogen and commensal of humans. Several features of the  
61 epidemiology of *S. saprophyticus* suggest that infections leading to UTIs are acquired  
62 from the environment, rather than as a result of person-to-person transmission (7). This  
63 implies that adoption of the pathogenic niche by *S. saprophyticus* has not entailed a  
64 trade-off in its ability to live freely in the environment. A recent PCR-based survey of  
65 virulence factors in clinical and animal associated isolates showed that *dsdA*, a gene  
66 encoding D-serine deaminase that is important for survival in urine (8), and *uafA* and  
67 *aas*, adhesins that mediate binding to uroepithelium (9, 10), were present in all isolates  
68 surveyed (11), suggesting an underlying pleiotropy, with these virulence factors playing  
69 important roles in the diverse environments occupied by *S. saprophyticus*.

70 The human urinary tract could represent an evolutionary dead end for *S. saprophyticus*  
71 with “virulence factors” such as DsdA, UafA and Aas serving an essential function in the  
72 primary environmental niche and enabling invasion of the urinary tract as an accidental  
73 by-product of this unknown primary function. In this case, we would expect urinary  
74 isolates to be interspersed throughout a phylogeny of isolates from the primary niche(s).  
75 However, our previous research (7) indicated that human urinary tract infections are  
76 associated with a specific lineage of *S. saprophyticus*. Invasion of the human urinary  
77 tract enables *S. saprophyticus* to grow to large numbers in urine, isolated from  
78 competing bacterial species, before being re-deposited in the environment. This is  
79 analogous to *Vibrio cholerae*, which cycles through human and environmental niches  
80 and grows to high abundance in the human gut before being deposited in the

81 environment via stool (12, 13). Based on our previous observations and the example  
82 provided by other human pathogens that cycle through the environment, we  
83 hypothesized that the human urinary tract is an ecologically important niche for *S.*  
84 *saprophyticus* and sought to identify genetic signatures of adaptation to this niche.

85 The increased availability of sequencing data has enabled comparative genomic  
86 approaches that have led to identification of changes in gene content in association with  
87 pathogen emergence and shifts in host association. Several notable human pathogens,  
88 including *Mycobacterium tuberculosis*, *Yersinia pestis*, and *Francisella tularensis*, are  
89 the product of a single emergence characterized by gene loss and horizontal acquisition  
90 of virulence factors (14–16). Similarly, genomic analysis of *Enterococcus faecium*  
91 revealed gene gains and losses affecting metabolism and antibiotic resistance in the  
92 emergence of a hypermutable hospital-adapted clade that coincided with the profound  
93 shift in hospital ecology caused by development of antibiotics (17). Gene gains via  
94 recombination have also allowed *Staphylococcus aureus* ST71 to emerge into a bovine-  
95 associated niche (18).

96 Using contemporary and ancient genomic data from strains of *S. saprophyticus*, we  
97 found previously that UTI-associated lineages of *S. saprophyticus* were not attendant  
98 with specific gene gains or losses; the evolutionary genetic processes underlying *S.*  
99 *saprophyticus*' adoption of the human-pathogenic niche are likely more subtle than what  
100 has been described for canonical pathogens (7). Here we have identified one of the  
101 mechanisms underlying *S. saprophyticus*' adaptation to the uropathogenic niche: a  
102 selective sweep in the Aas adhesin, which is associated with an apparently large-scale  
103 expansion into the human-pathogenic niche. This is, to our knowledge, the first  
104 identification of a single nucleotide sweep in a bacterium.

## 105 **Results.**

106 We reconstructed the phylogeny of *S. saprophyticus* isolates (Table S1) from a whole  
107 genome alignment using maximum likelihood inference implemented in RAxML (Figure  
108 1). The bacterial isolates are separated into two clades, which we have previously  
109 named Clades P and E (7). In both clades, human associated lineages are nested

110 among isolates from diverse sources, including food (cheese rind, ice cream, meat),  
111 indoor and outdoor environments, and animals. Interestingly, cheese rinds harbor  
112 diverse strains of *S. saprophyticus*, which cluster with both human- and animal-  
113 pathogenic strains.

114 Thirty-three of 37 modern, human-pathogenic isolates are found within a single lineage  
115 (that we term lineage U, for UTI-associated) to which bovine-pathogenic (mastitis), food-  
116 associated isolates, and an ancient genome are basal. Given the association between  
117 this lineage and illness in humans, we were curious about its potential adaptation to the  
118 human pathogenic niche. The placement of the 800-year old strain between bovine and  
119 human-associated lineages suggests it could represent a generalist intermediate  
120 between human-adapted and bovid-adapted strains.

121 Core genome analysis of the 58 isolates of *S. saprophyticus* in our sample showed  
122 substantial variability in gene content; the core genome is composed of 1798 genes,  
123 and there are an additional 7110 genes in the pan genome. We found previously that  
124 uropathogenic isolates of *S. saprophyticus* were not associated with any unique gene  
125 content (7). Given the variability in accessory gene content among this larger sample of  
126 isolates, we decided to test for relative differences in accessory gene content between  
127 human clinical isolates and other isolates using Scoary (19), which performs a genome  
128 wide association study (GWAS) using gene presence and absence. We did not identify  
129 any genes that were significantly associated with the human pathogenic niche after  
130 correction for multiple hypothesis testing using the Bonferroni method.

131 In addition to the variability observed in gene content, analyses of the core genome also  
132 indicated relatively frequent recombination among *S. saprophyticus* (Figure 3). We  
133 identified recombinant regions with Gubbins (20), which identifies regions with high  
134 densities of substitutions. These results indicated that 70% of sites in the *S.*  
135 *saprophyticus* alignment have been affected by recombination. Recombination can  
136 affect bacterial evolution both by introducing novel polymorphisms from outside the  
137 population and by reshuffling alleles without increasing overall diversity. Considering  
138 sites that are reshuffled within the *S. saprophyticus* sample as recombinant, we  
139 estimate a ratio of recombinant to non-recombinant SNPs of 3.4. When considering only

140 the SNPs that introduce novel diversity as recombinant, our estimate of the ratio of  
141 recombinant SNPs to non-recombinant SNPs is 0.51. The mean  $r/m$  of branches in the  
142 phylogeny is 0.82 as estimated by Gubbins (range: 0-7.6). Removal of recombinant  
143 SNPs did not affect the topology of the maximum likelihood phylogeny. We observed  
144 regional patterns in the amount of recombination inferred, and, as expected,  
145 recombination appears frequent at mobile elements such as the staphylococcal  
146 cassette chromosomes (SCC<sub>15305RM</sub> and SCC<sub>15305cap</sub>) and  $\nu$ Ss15305 (10).

147 Adaptation to a new environment may be facilitated by advantageous mutations that  
148 quickly rise in frequency, leaving a characteristic genomic imprint: reduced diversity at  
149 the target locus and nearby linked loci (i.e. selective sweep, (21, 22)). In order for  
150 positive selection to be evident as a local reduction in diversity, there must be sufficient  
151 recombination that the target locus is unlinked from the rest of the genome; for this  
152 reason, scans for sweeps have been used primarily for sexually reproducing organisms  
153 (23–26). As described above and in prior work (7), we found evidence of frequent  
154 recombination among *S. saprophyticus*. We hypothesized that *S. saprophyticus*'  
155 transition to the uropathogenic niche may have been driven by selection for one or more  
156 mutations that were advantageous in the new environment, and that levels of  
157 recombination have been sufficient to preserve the signature of a selective sweep at loci  
158 under positive selection. We therefore used a sliding window analysis of diversity along  
159 the *S. saprophyticus* alignment as an initial screen for positive selection. We identified a  
160 marked regional decrease in nucleotide diversity ( $\pi$ ) and Tajima's D (TD) that is specific  
161 to lineage U (Figure 2); TD for this window was -0.38 and 0.94 for non-lineage U Clade  
162 P isolates and Clade E isolates, respectively. The region with decreased  $\pi$  /TD  
163 corresponds to 1,760,000-1,820,000 bp in *S. saprophyticus* ATCC 15305 and has the  
164 lowest values of  $\pi$  and TD in the entire alignment. We investigated the sensitivity of our  
165 sliding window analyses to sampling by randomly subsampling lineage U isolates to the  
166 same size as Clade E ( $n = 10$ ); we found the results to be robust to changes in sampling  
167 scheme and size.

168 To complement the sliding window analysis and pinpoint candidate variants under  
169 positive selection, we used an approach based on allele frequency differences between

170 bacterial isolates from different niches. We calculated Weir and Cockerham's  $F_{ST}$  (27)  
171 for single nucleotide polymorphisms (SNPs) in the *S. saprophyticus* genome using  
172 human association and non-human association to define populations. The region of low  
173  $\pi$  /TD included three non-synonymous variants in the top 0.05% of  $F_{ST}$  values (Table 1).  
174 One of these variants was fixed among human-associated isolates in lineage U  
175 (position 1811777 in ATCC 15305,  $F_{ST} = 0.48$ ) and distinct from the ancestral allele  
176 found in basal lineages of Clade P, including the ancient strain of *S. saprophyticus* Troy.  
177 This suggests that the variant may have been important in adaptation to the human  
178 urinary tract. To assess the significance of the  $F_{ST}$  value for this variant, we performed  
179 permutations by randomly assigning isolates as human associated, and we did not  
180 achieve  $F_{ST}$  values higher than 0.28 in 100 permutations.

181 Selective sweeps may be evident as a longer than expected haplotype block, since  
182 neutral variants linked to the adaptive mutation will also sweep to high frequencies (28).  
183 Given the evidence suggesting there was a selective sweep at this locus, we used  
184 haplotype based statistics to test for such a signature in the *S. saprophyticus* alignment.  
185 Haplotype-based methods are hypothesized to not be applicable to bacteria due to  
186 differences between crossing over and bacterial patterns of recombination (29), but the  
187 methods had not been tested in a scenario akin to a classical sweep, in which local  
188 changes in diversity and the SFS have been observed. We found that the variant at  
189 position 181177 did show a signature of a sweep using the extended haplotype  
190 homozygosity (EHH) statistic (28) (Figure 4). However, the variant did not have an  
191 extreme value of  $nS_L$ , which compares haplotype homozygosity for ancestral and  
192 derived alleles (30), after normalization by the allele frequency.

193 The variant of interest (*aas\_2206A>C*) causes a threonine to proline change in the  
194 amino acid sequence of Aas, a bifunctional autolysin with a fibronectin binding domain  
195 (Figure 5, (31)). There are 8 additional nonsynonymous polymorphisms in the  
196 fibronectin binding domain; however, none are as highly associated with human  
197 pathogenic isolates (Table 1). Adhesins such as Aas are important in the pathogenesis  
198 of *S. saprophyticus* urinary tract infections, and this gene has been previously  
199 implicated as a virulence factor (9, 31, 32).



200 The Aas variant is in a region known to bind fibronectin (Figure 5, (31)) and may be  
201 under selection because it affects adhesion to this host protein. We used ELISAs to  
202 investigate potential effects of *aas\_2206A>C* on binding to fibronectin and  
203 thrombospondin-1, which binds to this region of the homologous AtIE amidase from  
204 *Staphylococcus epidermidis* (33). Staphylococcal autolysins contains 3 C-terminal  
205 repeats (R1-R3), which can each be divided into two subunits (a and b) based on  
206 structural information (34). We confirmed that Aas R1a1b binds fibronectin and  
207 discovered that it also binds thrombospondin (Figure 6); there was no detectable  
208 difference between the ancestral and derived R1a1b alleles in binding to fibronectin or  
209 thrombospondin (human or bovine).

210 Interestingly, we observed several instances of recombination of the *aas* variant. In  
211 each case, the recombination event reinforced the association of the derived allele with  
212 human infection. Two of the non-human-associated bacterial isolates in lineage U – an  
213 isolate from a pig and a second from cheese rind – had evidence of a recombination  
214 event at the *aas* locus resulting in acquisition of the ancestral allele. Conversely, one of  
215 the human UTI isolates in Clade E (for which the ancestral allele is otherwise fixed)  
216 acquired the derived *aas* variant.

217 Several human pathogens appear to have undergone recent population expansion (35–  
218 38). We wondered whether the uropathogenic lineage of *S. saprophyticus* might also  
219 have undergone a recent change in its effective size. The genome wide estimate of TD  
220 for lineage U was negative (-0.58), which is consistent with population expansion. We  
221 used the methods implemented in *∂a∂i* (39) to identify the demographic model that best  
222 fit the observed synonymous SFS of lineage U (Figure 7).

223 The synonymous SFS showed an unexpected excess of high frequency derived alleles,  
224 which we hypothesized were the result of gene flow from populations with ancestral  
225 variants. Within population recombination has been shown to have no effect on SFS-  
226 based methods of demographic inference in bacteria (40). However, external sources of  
227 recombination were not modeled in previous studies. We used SimBac (41) to simulate  
228 bacterial populations with a range of internal and external recombination rates. Similar  
229 to previous studies, we did not find that within population recombination had an effect



230 the value of Tajima's D. However, we found that recombinant tracts from external  
231 sources resulted in positive values of Tajima's D (Figure 8). Positive values of Tajima's  
232 D are also associated with population bottlenecks and balancing selection.

233 We used fastGEAR (42) to identify recombinant tracts that originated outside of lineage  
234 U, and these sites were removed from the analysis prior to demographic inference. We  
235 compared five demographic models (constant size, instantaneous population size  
236 change, exponential population size change, instantaneous population size change  
237 followed by exponential, and two instantaneous population size changes, Figure 9) and  
238 used bootstrapping to estimate the uncertainty of the parameters and to adjust the  
239 composite likelihoods using the Godambe Information Matrix implemented in  $\partial a \partial i$  (43).  
240 We found significant evidence for an expansion in all models (Table 2). The best fitting  
241 model was an instantaneous contraction followed by an instantaneous expansion, in  
242 which the population underwent a tight bottleneck followed by a 15-fold expansion  
243 without recovering to its ancestral size ( $v = N_e/N_{anc}$ ,  $\tau = \text{generations}/N_{anc}$ ,  $v_A: 2.9 \times 10^{-2}$ ,  
244  $v_B: 4.5 \times 10^{-1}$ ,  $\tau_A: 1.2 \times 10^{-1}$ ,  $\tau_B: 3.1 \times 10^{-3}$ ).

245 Recombination and positive selection are known to confound the inference of bacterial  
246 demography (40), so we used simulations to investigate their effects on our  
247 demographic inference for uropathogenic *S. saprophyticus*. We used SFS\_CODE (44)  
248 to simulate positive selection (with a range of recombination rates) and evaluate its  
249 effects on the accuracy of demographic inference with  $\partial a \partial i$ . The method implemented in  
250  $\partial a \partial i$  relies on inference from the synonymous SFS, but it's possible for synonymous  
251 variation to be affected by selection, particularly at low rates of recombination (40, 45).  
252 Neutral simulations with gene conversion did not affect demographic inference. We did  
253 find that positive selection can affect the synonymous SFS, resulting in inference of  
254 population size changes. In simulations of positive selection in a population of constant  
255 size, we found the spurious inference to be a bottleneck rather than an expansion. This  
256 suggests that the observed synonymous SFS of lineage U has been affected both by  
257 positive selection and by demographic expansion.

258

## 259 **Discussion.**

260 A central question in the population biology of infectious diseases is how and why  
261 pathogenic traits emerge in microbes. Addressing this question is important for  
262 understanding novel disease emergence and for identifying the genetic basis of  
263 virulence. Here we present evidence suggesting that a mutation in *S. saprophyticus*'  
264 *aas*, which binds host matrix proteins, is under positive selection and has enabled  
265 emergence and spread of a human pathogenic, UTI-associated lineage of this  
266 bacterium.

267 *S. saprophyticus* is familiar to medical microbiologists and clinicians as a common  
268 cause of UTIs (46), which are associated with significant morbidity, economic costs, and  
269 severe complications (4). Despite its strong association with UTIs in humans, *S.*  
270 *saprophyticus* can also be isolated from diverse environments including livestock, food  
271 and food processing plants, and the environment (47, 48). Our previous research  
272 suggested that pathogenicity to humans is a derived trait in the species (7).

273 This pattern is replicated here, where phylogenetic analyses link human UTI with two  
274 lineages of *S. saprophyticus* that are nested among isolates from diverse, non-human  
275 niches (i.e. free living, food- and animal-associated) . The *aas* mutation arose in lineage  
276 U, which contains most of the UTI isolates. Two lineages are basal to lineage U: one is  
277 bovine-associated, and the other contains an ancient bacterial sequence from a  
278 pregnancy-related infection in Late Byzantine Troy. The Troy bacterium has the  
279 ancestral, bovine-associated *aas* allele, and we have previously hypothesized (7) that  
280 this lineage could be associated with human infections in regions where humans have  
281 close contacts – e.g. shared living quarters– with livestock, as they did at Troy during  
282 this time.

283 A second cluster of UTI isolates appears in Clade E. One isolate has acquired the  
284 derived *aas* allele, which parallels our finding that two non-human isolates in lineage U  
285 acquired the ancestral variant; all recombination events that we observed at this locus  
286 reinforced the association between *aas\_2206A>C* and human infection.

287 Several UTI isolates in Clade E do not have the derived *aas* allele and the clustering of  
288 UTI isolates suggests there may be a distinct adaptive path to virulence in this clade.  
289 Larger and more comprehensive samples will be needed to investigate this hypothesis  
290 and to identify the factors shaping the separation of clades P & E.

291 The *aas* mutation has characteristics associated with a classical selective sweep driven  
292 by positive selection, namely a regional reduction in diversity (21) and Tajima's D (22,  
293 49). With the exception of the interesting allelic replacements noted above, there was  
294 also relatively little recombination at this locus, consistent with it being functionally  
295 important. To our knowledge, this is the first description of a single nucleotide sweep in  
296 a bacterium.

297 Depending on the strength of selection and recombination rate, positive selection in  
298 bacteria has been observed to affect the entire genome, resulting in clonal  
299 replacements, or to only affect specific regions of the genome (50). For example,  
300 multiple clonal replacements have occurred in *Shigella sonnei* populations in Vietnam  
301 due to acquisition of resistance to antimicrobials and environmental stress (51).  
302 Recurrent clonal replacements have also been observed within single hosts during  
303 chronic infection of cystic fibrosis patients by *Pseudomonas aeruginosa* (52).

304 Environmental bacterial populations can also be subject to clonal replacements: a  
305 metagenomic time course study of Trout Bog found evidence of clonal replacement  
306 occurring in natural bacterial populations but not gene or region specific sweeps (53).  
307 However, large regions of low diversity were also observed, suggesting gene-specific  
308 selective sweeps had occurred prior to the start of the study. Shapiro et al. identified  
309 genomic loci that differentiated *Vibrio cyclitrophicus* associated with distinct niches but  
310 that had limited diversity within niches; they concluded that differentiation of these  
311 populations had been enabled by recombination events that reinforced the association  
312 of alleles with the niche in which they were advantageous (54).

313 The *aas*<sub>2206A>C</sub> mutation is within a group of genetic variants that differentiates  
314 bacteria associated with human-pathogenic versus other niches (i.e.  $F_{ST}$  outlier). SNPs  
315 associated with specific clinical phenotypes were described recently in the pathogen  
316 *Streptococcus pyogenes* (55), which is consistent with our finding that clinical

317 phenotypes can represent distinct niche spaces preferentially occupied by sub-  
318 populations of bacteria. There is also precedent for a single nucleotide polymorphism to  
319 affect host tropism of bacteria (56).

320 In sexually reproducing organisms, haplotype based statistics are frequently used to  
321 identify selective sweeps because positively selected alleles will also increase the  
322 frequency of nearby linked loci faster than recombination can disrupt linkage, producing  
323 longer haplotypes for selected alleles (28, 57). We found that *aas\_2206A>C* had a  
324 longer haplotype than the ancestral variant, but this difference was not extreme relative  
325 to other regions of the genome (assessed with the  $nS_L$  statistic). Haplotype based  
326 statistics have been found to perform poorly in purebred dogs, where linkage across the  
327 genome is high (58). Relatively low levels of recombination may also contribute to a lack  
328 of sensitivity when haplotype-based detection methods are applied to bacteria; linkage  
329 of sites is also likely to be disrupted in a less predictable way by bacterial gene  
330 conversion than by crossing over (29). Based on our findings, we conclude that  
331 screening for regional decreases in diversity and distortions of the SFS (i.e. sliding  
332 window analyses) and identification of genetic variants with extreme differences in  
333 frequency between niches can be useful in identifying candidate sites of positive  
334 selection in bacteria.

335 *S. saprophyticus* encodes a number of adhesins including UafA, UafB, SdrI, and Aas.  
336 UafA and Aas are found in all isolates, suggesting that they play important roles in the  
337 diverse niches occupied by *S. saprophyticus*. Aas has autolytic, fibronectin binding, and  
338 haemagglutinating functions (9, 31, 32, 59). We identified a single, non-synonymous  
339 polymorphism as a target of selection in the fibronectin binding repeats of Aas. This  
340 variant is predicted to affect the repeat's structure, as proline has a more rigid structure  
341 than other amino acids. Adhesins are plausible candidates for adaptation to the  
342 uropathogenic niche, as they are known to be important virulence factors in pathogens  
343 causing urinary tract infections (60). Fibronectin binding proteins including Aas have  
344 been identified as virulence factors in *S. saprophyticus* and *Enterococcus faecalis* (32,  
345 61, 62). Adhesion to the uroepithelium is essential for uropathogens to establish  
346 themselves in the bladder, where they are subject to strong shear stress (63): we

347 hypothesize that *S. saprophyticus* with the derived aas variant are better able to  
348 colonize the human bladder.

349 Invasion of the human urinary tract may provide a fitness advantage by allowing relative  
350 enrichment of *S. saprophyticus* in a site with little competition from other bacterial  
351 species and by providing a mechanism of dispersal in the environment. In analyses of  
352 selection in *Escherichia coli*, another bacterium occupying diverse niches, residues in  
353 the adhesin FimH were found to be subject to positive selection in uropathogenic strains  
354 (64–66). FimH binds mannose, providing protection from shear stress through a catch  
355 bond mechanism (67). Interestingly, *Borrelia burgdorferi*'s vascular adherence and  
356 resistance to shear stress were recently found to be enabled by interactions between a  
357 bacterial adhesin and host fibronectin that also use a catch bond mechanism (68).  
358 There are also precedents in *Staphylococcus aureus* for polymorphisms in bacterial  
359 fibronectin-binding adhesins to affect the strength of binding, and for these  
360 polymorphisms to associate with specific clinical phenotypes (69).

361 Further experiments are needed to investigate the effects of variation in Aas on *S.*  
362 *saprophyticus* biology. In our preliminary investigations of binding using ELISA assays  
363 of recombinant bacterial peptides, we did not detect differences between ancestral and  
364 derived alleles in binding of the R1a1b repeat to fibronectin. The variant could still affect  
365 fibronectin binding by altering conformation of the protein in a manner analogous to  
366 FimH in *E. coli* (66). It's also possible that variants in the peptide affect binding under  
367 specific conditions that we did not test. Another possibility is that the variant affects  
368 autolysis or other as yet undescribed functions of Aas. The roles of adhesins and other  
369 virulence factors in *S. saprophyticus*'s colonization of niches in livestock and the  
370 environment are also interesting topics for further study.

371 Our demographic analysis of the uropathogenic lineage of *S. saprophyticus* showed  
372 evidence of a population bottleneck and subsequent expansion. Bottlenecks and  
373 expansion of drug resistant clones have previously been shown to affect the population  
374 structure of *Streptococcus agalactiae* (70), demonstrating the effects of positive  
375 selection on the demographic trajectories of bacterial sub-populations. However,  
376 previous work has also shown that selection - and recombination - can produce

377 spurious results from demographic inference in bacteria (40, 71). We used an SFS-  
378 based method to reconstruct the demographic history of *S. saprophyticus*: the accuracy  
379 of demographic inference using these methods has been shown to be unaffected by  
380 within-population recombination (40) and this was confirmed in our analyses of  
381 simulated data. We found that recombination from external sources may result in an  
382 excess of intermediate frequency variants, which is also a signature of population  
383 bottlenecks, so we masked externally imported sites. However, the frequency of  
384 synonymous variants could still be affected by selection on linked non-synonymous  
385 sites, including the selective sweep in *aas* that we have described. We performed  
386 simulations to address these potential confounders and aid in the interpretation of our  
387 demographic inferences. Simulation of a single site under positive selection resulted in  
388 the inference of a bottleneck ( $N_e/N_a = 0.01-0.42$ ), indicating that, at the recombination  
389 rates we simulated, diversity was lost from neutrally evolving sites due to their linkage to  
390 the site under selection. In inferences from our observed data, a bottleneck was  
391 followed by a 15-fold expansion, suggesting that lineage U has undergone both a  
392 selective sweep and demographic expansion.

393 Here we have described adaptation of *S. saprophyticus* that may have enabled its  
394 expansion into a human pathogenic niche. Mutation of a single nucleotide within the *aas*  
395 adhesin appears to have driven a selective sweep, and allele frequency differences at  
396 the locus are consistent with niche-specific adaptation. Lateral gene transfer events in  
397 *aas* reinforced the association of the positively selected allele with human infection.  
398 These results provide new insights into the emergence of virulence in bacteria and  
399 outline an approach for discovering the molecular basis of adaptation to the human  
400 pathogenic niche.

#### 401 **Methods.**

402 *DNA extraction.* After overnight growth in TSB at 37°C in a shaking incubator, cultures  
403 were pelleted and resuspended in 140 µL TE buffer. Cells were incubated overnight  
404 with 50 units of mutanolysin. We used the MasterPure Gram Positive DNA Purification  
405 Kit (EpiCentre) for DNA extraction. For DNA precipitation we used 1 mL 70% ethanol



406 and centrifuged at 4°C for 10 minutes. We additionally used a SpeedVac for 10 minutes  
407 to ensure pellets were dry before re-suspending the pellet in 50 µL water.

408 *Library preparation and sequencing.* For SSC01, SSC02, and SSC03, library prep was  
409 performed using a modified Nextera protocol as described by Baym et al. (72) with a  
410 reconditioning PCR with fresh primers and polymerase for an additional 5 PCR cycles to  
411 minimize chimeras and a two-step bead based size selection with target fragment size  
412 of 650 bp and sequenced on an Illumina HiSeq 2500 (paired-end, 150 bp). For 43,  
413 SSC04, SCC05, and SSMast, DNA was submitted to the University of Wisconsin-  
414 Madison Biotechnology Center for library preparation and were prepared according to the  
415 TruSeq Nano DNA LT Library Prep Kit (Illumina Inc., San Diego, California, USA) with  
416 minor modifications. A maximum of 200 ng of each sample was sheared using a  
417 Covaris M220 Ultrasonicator (Covaris Inc, Woburn, MA, USA). Sheared samples were  
418 size selected for an average insert size of 550 bp using Spri bead based size exclusion.  
419 Quality and quantity of the finished libraries were assessed using an Agilent DNA High  
420 Sensitivity chip (Agilent Technologies, Santa Clara, CA) and Qubit dsDNA HS Assay  
421 Kit, respectively. Libraries were standardized to 2 µM. Paired-end, 150 bp sequencing  
422 was performed using v2 SBS chemistry on an Illumina MiSeq sequencer. Images were  
423 analyzed using the Illumina Pipeline, version 1.8.2.

424 *Reference guided mapping.* We mapped reads to ATCC 15305 using via a pipeline  
425 (available at <https://github.com/pepperell-lab/RGAPepPipe>). Briefly, read quality was  
426 assessed and trimmed with TrimGalore! v 0.4.0  
427 ([www.bioinformatics.babraham.ac.uk/projects/trim\\_galore](http://www.bioinformatics.babraham.ac.uk/projects/trim_galore)), which runs both FastQC  
428 ([www.bioinformatics.babraham.ac.uk/projects/fastqc](http://www.bioinformatics.babraham.ac.uk/projects/fastqc)) and cutadapt. Reads were  
429 mapped to using BWA-MEM v 0.7.12 (73) and sorted using Samtools v 1.2 (74). We  
430 used Picard v 1.138 ([picard.sourceforge.net](http://picard.sourceforge.net)) to add read group information and  
431 removed duplicates. Reads were locally realigned using GATK v 2.8.1 (75). We  
432 identified variants using Pilon v 1.16 (76) (minimum read depth: 10, minimum mapping  
433 quality: 40, minimum base quality: 20).

434 *Assembly.* We used the iMetAMOS pipeline for *de novo* assembly (77). We chose to  
435 compare assemblies from SPAdes (78), MaSurCA (79), and Velvet (80). KmerGenie

436 (81) was used to select kmer sizes for assembly. iMetAMOS uses FastQC, QUAST  
437 (82), REAPR (83), LAP (84), ALE (85), FreeBayes (86), and CGAL (87) to evaluate the  
438 quality of reads and assemblies. We also used Kraken (88) to detect potential  
439 contamination in sequence data. For all newly assembled isolates (43, SSC01-05,  
440 SSMast), the SPAdes assembly was the highest quality. Assembly statistics are  
441 reported in Table S2.

442 *Annotation and gene content analyses.* We annotated the de novo assemblies using  
443 Prokka v 1.11 (89) and used Roary (90) to identify orthologous genes in the core and  
444 accessory genomes. To look for associations between accessory gene content and  
445 human association, we used Scoary (19). For the analysis, we used human association  
446 as our trait, and we adjusted the p-value for multiple comparisons using the Bonferroni  
447 method.

448 *Alignment.* When short read data for reference guided mapping were unavailable, whole  
449 genome alignment of genomes to ATCC 15305 was performed using Mugsy v 2.3 (91).  
450 Repetitive regions in the reference genome greater than 100 bp were identified using  
451 nucmer, and these regions were masked in the alignment used in downstream  
452 analyses.

453 *Maximum likelihood phylogenetic analysis.* Maximum likelihood phylogenetic trees were  
454 inferred using RAxML 8.0.6 (92). We used the GTRGAMMA substitution model and  
455 performed bootstrapping using the autoMR convergence criteria. Tree visualizations  
456 were created in ggtree (93).

457 *Population genetics statistics.* To calculate  $\pi$  and Tajima's D, we used EggLib v 2.1.10  
458 (94), a Python package for population genetic analyses. A script to perform the sliding  
459 window analysis is available at [https://github.com/tatumdmortimer/popgen-](https://github.com/tatumdmortimer/popgen-stats/slidingWindowStats.py)  
460 [stats/slidingWindowStats.py](https://github.com/tatumdmortimer/popgen-stats/slidingWindowStats.py). We used vcflib (<https://github.com/vcflib/vcflib>) to calculate  
461  $F_{ST}$  and EHH and selscan v 1.1.0b (95) to calculate  $nS_L$ .

462 *Recombination analyses.* To identify recombinant regions in the *S. saprophyticus*  
463 alignment, we used Gubbins v 2.1.0 (20). fastGEAR (42) was used with the  
464 recommended input specifications to identify recombination events between major

465 lineages of *S. saprophyticus*. We used Circos (96) for visualization of recombinant  
466 tracts.

467 *Site frequency spectrum*. We used SNP-sites v 2.0.3 (97) to convert the alignment of *S.*  
468 *saprophyticus* isolates to a multi-sample VCF. SnpEff v 4.1j (98) was used to annotate  
469 variants in this VCF as synonymous, non-synonymous, or intergenic. Using the Troy  
470 genome as an outgroup, we calculated an unfolded site frequency spectrum (SFS) for  
471 lineage U for each category of sites. To reduce the impact of lateral gene transfer on the  
472 SFS, we removed sites where the origin was outside lineage U based on results of  
473 fastGEAR.

474 *Ancestral reconstruction of aas\_2206A>C*. We used TreeTime (99) to reconstruct the  
475 evolutionary history of the variant in *aas* using the maximum likelihood phylogeny  
476 inferred using RAxML.

477 *Demography*. We performed demographic inference with the synonymous SFS using  
478  $\partial a \partial i$  (39). Models tested were the standard neutral model, expansion, and exponential  
479 growth. Parameters,  $\nu$  ( $N_e / N_a$ ) and  $\tau$  (time scaled by 2), were optimized for both the  
480 expansion and exponential growth models. Significance of the expansion and  
481 exponential growth model compared to the standard neutral model was evaluated using  
482 a likelihood ratio test. The scripts used to perform this analysis are available at  
483 <https://github.com/tatumdmortimer/popgen-stats>.

484 *Simulations*. Simulations were performed in SimBac (41) to evaluate the effect of  
485 external recombination on the SFS. Populations were simulated with sample size and  $\theta$   
486 equivalent to our sample of lineage U ( $n = 44$ ,  $\theta = 0.003$ ). The length of internal  
487 recombinant tracts was 6500 bp (median of Gubbins output), and the length of external  
488 recombination events was 3000 bp (median of fastGEAR output). Internal  
489 recombination was simulated at rates ranging from 0 to 0.03 ( $r/m = 10$ ). External  
490 recombination was simulated at rates ranging from 0 to 0.003. The lower bound of  
491 difference for external recombination was 0, and the upper bound was simulated at  
492 ranges from 0.25-1.0. Simulations were performed in SFS\_CODE (release date  
493 9/10/2015) (44) to evaluate the power of  $\partial a \partial i$  to accurately estimate demographic

494 parameters in the presence of gene conversion and selection. We simulated a locus of  
495 length 100 kb with theta 0.003, gene conversion tract length of 1345 bp, and a range of  
496 recombination/mutation ratios (0.0002-2.0). In addition to neutral simulations with gene  
497 conversion, we also performed simulations with a single site under selection ( $\gamma = 10$ -  
498 1000) with the same parameters as neutral simulations.

499 *Expression of R1ab.* Human-associated and ancestral strain R1ab were cloned into the  
500 expression vector pET-ELMER (LM Maurer 2010, JBC), transformed into  
501 BL21(DE3) cells (EMD, Gibbstown, NJ) for expression and induced with 1mM IPTG.  
502 Bacteria were lysed in 100 mM NaH<sub>2</sub>PO<sub>4</sub>, 10 mM Tris, 8M urea, 1 mM  $\beta$ -mercapto-  
503 ethanol, 5 mM imidazole, pH 8.0 (lysis buffer). The cleared lysate was incubated  
504 overnight with nickel-nitrilotriacetic acid agarose (Qiagen), washed and eluted in lysis  
505 buffer pH 7.0 plus 300 mM imidazole.

506 *ELISA.* Antigen was diluted to 10  $\mu$ g/ml in TBS (10 mM Tris, 150 mM, pH 7.4) and used  
507 to coat 96-well microtiter plates (Costar 3590 high binding, Corning Inc., Corning, NY)  
508 with 50  $\mu$ l per well, for 16 h at 4°C. The plates were blocked with 1% BSA in TBS plus  
509 0.05% Tween-20 (TBST) for 1 h. After washing three times with TBST, purified plasma  
510 fibronectin (100) or platelet-derived thrombospondin-1 (101) diluted to 10, 3, 1, or  
511 0.3 $\mu$ g/ml in TBST plus 0.1% BSA, were added to the plates and incubated for 2 h.  
512 Plates were washed four times with TBST. Rabbit anti-fibronectin and rabbit anti-  
513 thrombospondin antibodies diluted in TBST plus 0.1% BSA were added to the  
514 appropriate wells and incubated for 1 h. Plates were washed four times with TBST.  
515 Peroxidase-conjugated secondary antibody was incubated with the plates for 1 h.  
516 Plates were washed four times with TBST and 50  $\mu$ l per well of SureBlue TMB  
517 peroxidase substrate (KLP) was added to each well. Color development was monitored  
518 for 10-30 min, 50  $\mu$ l of TMB stop solution (KLP) was added, followed by measurement  
519 of absorbance at 450nm.

## 520 **Funding Information.**

521 This material is based upon work supported by the National Science Foundation  
522 Graduate Research Fellowship Program under Grant No. DGE-1256259 to TDM and

523 MBO. Any opinions, findings, and conclusions or recommendations expressed in this  
524 material are those of the author(s) and do not necessarily reflect the views of the  
525 National Science Foundation. TDM is also supported by National Institutes of Health  
526 National Research Service Award (T32 GM07215). CSP is supported by National  
527 Institutes of Health (R01AI113287).

### 528 **Acknowledgments.**

529 We thank Andrew Kitchen (University of Iowa), Jeniel Nett (UW-Madison), JD Sauer  
530 (UW-Madison), and Rod Welch (UW-Madison) for their helpful input on this study. We  
531 also thank the University of Wisconsin Biotechnology Center DNA Sequencing Facility  
532 for providing library preparation and sequencing facilities and services.

533

534 **References.**

- 535 1. Stamm WE, Norrby SR. 2001. Urinary Tract Infections: Disease Panorama and  
536 Challenges. *J Infect Dis* 183:S1–S4.
- 537 2. Ronald AR, Nicolle LE, Stamm E, Krieger J, Warren J, Schaeffer A, Naber KG,  
538 Hooton TM, Johnson J, Chambers S, Andriole V. 2001. Urinary tract infection in  
539 adults: research priorities and strategies. *Int J Antimicrob Agents* 17:343–348.
- 540 3. Barber AE, Norton JP, Spivak AM, Mulvey MA. 2013. Urinary Tract Infections:  
541 Current and Emerging Management Strategies. *Clin Infect Dis* 57:719–724.
- 542 4. Foxman B. 2014. Urinary tract infection syndromes: occurrence, recurrence,  
543 bacteriology, risk factors, and disease burden. *Infect Dis Clin North Am* 28:1–13.
- 544 5. Wallmark G, Arremark I, Telander B. 1978. *Staphylococcus saprophyticus*: A  
545 Frequent Cause of Acute Urinary Tract Infection among Female Outpatients. *J*  
546 *Infect Dis* 138:791–797.
- 547 6. Kahlmeter G. 2003. An international survey of the antimicrobial susceptibility of  
548 pathogens from uncomplicated urinary tract infections: the ECO-SENS Project. *J*  
549 *Antimicrob Chemother* 51:69–76.
- 550 7. Devault AM, Mortimer TD, Kitchen A, Kiesewetter H, Enk JM, Golding GB, Southon  
551 J, Kuch M, Duggan AT, Aylward W, Gardner SN, Allen JE, King AM, Wright G,  
552 Kuroda M, Kato K, Briggs DE, Fornaciari G, Holmes EC, Poinar HN, Pepperell CS.  
553 2017. A molecular portrait of maternal sepsis from Byzantine Troy. *eLife* 6:e20983.
- 554 8. Gatermann S, John J, Marre R. 1989. *Staphylococcus saprophyticus* urease:  
555 characterization and contribution to uropathogenicity in unobstructed urinary tract  
556 infection of rats. *Infect Immun* 57:110–116.
- 557 9. Meyer HG, Wengler-Becker U, Gatermann SG. 1996. The hemagglutinin of  
558 *Staphylococcus saprophyticus* is a major adhesin for uroepithelial cells. *Infect*  
559 *Immun* 64:3893–3896.



- 560 10. Kuroda M, Yamashita A, Hirakawa H, Kumano M, Morikawa K, Higashide M,  
561 Maruyama A, Inose Y, Matoba K, Toh H, Kuhara S, Hattori M, Ohta T. 2005. Whole  
562 genome sequence of *Staphylococcus saprophyticus* reveals the pathogenesis of  
563 uncomplicated urinary tract infection. *Proc Natl Acad Sci U S A* 102:13272–13277.
- 564 11. Kleine B, Gatermann S, Sakinc T. 2010. Genotypic and phenotypic variation  
565 among *Staphylococcus saprophyticus* from human and animal isolates. *BMC Res*  
566 *Notes* 3:163.
- 567 12. Nelson EJ, Harris JB, Glenn Morris J, Calderwood SB, Camilli A. 2009. Cholera  
568 transmission: the host, pathogen and bacteriophage dynamic. *Nat Rev Microbiol*  
569 7:693–702.
- 570 13. Boucher Y, Orata FD, Alam M. 2015. The out-of-the-delta hypothesis: dense  
571 human populations in low-lying river deltas served as agents for the evolution of a  
572 deadly pathogen. *Front Microbiol* 6.
- 573 14. Veyrier FJ, Dufort A, Behr MA. 2011. The rise and fall of the *Mycobacterium*  
574 *tuberculosis* genome. *Trends Microbiol* 19:156–161.
- 575 15. McNally A, Thomson NR, Reuter S, Wren BW. 2016. “Add, stir and reduce”:  
576 *Yersinia* spp. as model bacteria for pathogen evolution. *Nat Rev Microbiol* 14:177–  
577 190.
- 578 16. Larsson P, Elfsmark D, Svensson K, Wikström P, Forsman M, Brettin T, Keim P,  
579 Johansson A. 2009. Molecular Evolutionary Consequences of Niche Restriction in  
580 *Francisella tularensis*, a Facultative Intracellular Pathogen. *PLoS Pathog*  
581 5:e1000472.
- 582 17. Lebreton F, Schaik W van, McGuire AM, Godfrey P, Griggs A, Mazumdar V,  
583 Corander J, Cheng L, Saif S, Young S, Zeng Q, Wortman J, Birren B, Willems RJL,  
584 Earl AM, Gilmore MS. 2013. Emergence of Epidemic Multidrug-Resistant  
585 *Enterococcus faecium* from Animal and Commensal Strains. *mBio* 4:e00534-13.

- 586 18. Fitzgerald JR, Nutbeam-Tuffs S, Richardson E, Lee CY, Gupta RK, Richards AC,  
587 Black NS, Corander J, McAdam PR, Spoor LE, O’Gara JP, Mendonca C, Wilson  
588 GJ. 2015. Recombination-mediated remodelling of host-pathogen interactions  
589 during *Staphylococcus aureus* niche adaptation. *Microb Genomics*.
- 590 19. Brynildsrud O, Bohlin J, Scheffer L, Eldholm V. 2016. Rapid scoring of genes in  
591 microbial pan-genome-wide association studies with Scoary. *Genome Biol* 17:238.
- 592 20. Croucher NJ, Page AJ, Connor TR, Delaney AJ, Keane JA, Bentley SD, Parkhill J,  
593 Harris SR. 2015. Rapid phylogenetic analysis of large samples of recombinant  
594 bacterial whole genome sequences using Gubbins. *Nucleic Acids Res* 43:e15–e15.
- 595 21. Smith JM, Haigh J. 1974. The hitch-hiking effect of a favourable gene. *Genet Res*.
- 596 22. Braverman JM, Hudson RR, Kaplan NL, Langley CH, Stephan W. 1995. The  
597 hitchhiking effect on the site frequency spectrum of DNA polymorphisms. *Genetics*  
598 140:783–796.
- 599 23. Harr B, Kauer M, Schlötterer C. 2002. Hitchhiking mapping: A population-based  
600 fine-mapping strategy for adaptive mutations in *Drosophila melanogaster*. *Proc Natl*  
601 *Acad Sci* 99:12949–12954.
- 602 24. Nair S, Williams JT, Brockman A, Paiphun L, Mayxay M, Newton PN, Guthmann J-  
603 P, Smithuis FM, Hien TT, White NJ, Nosten F, Anderson TJC. 2003. A Selective  
604 Sweep Driven by Pyrimethamine Treatment in Southeast Asian Malaria Parasites.  
605 *Mol Biol Evol* 20:1526–1536.
- 606 25. Wright SI, Gaut BS. 2005. Molecular Population Genetics and the Search for  
607 Adaptive Evolution in Plants. *Mol Biol Evol* 22:506–519.
- 608 26. de Simoni Gouveia JJ, da Silva MVGB, Paiva SR, de Oliveira SMP. 2014.  
609 Identification of selection signatures in livestock species. *Genet Mol Biol* 37:330–  
610 342.

- 611 27. Weir BS, Cockerham CC. 1984. Estimating F-Statistics for the Analysis of  
612 Population Structure. *Evolution* 38:1358–1370.
- 613 28. Sabeti PC, Reich DE, Higgins JM, Levine HZP, Richter DJ, Schaffner SF, Gabriel  
614 SB, Platko JV, Patterson NJ, McDonald GJ, Ackerman HC, Campbell SJ, Altshuler  
615 D, Cooper R, Kwiatkowski D, Ward R, Lander ES. 2002. Detecting recent positive  
616 selection in the human genome from haplotype structure. *Nature* 419:832–837.
- 617 29. Shapiro BJ. 2014. Signatures of Natural Selection and Ecological Differentiation in  
618 Microbial Genomes, p. 339–359. *In* Landry, CR, Aubin-Horth, N (eds.), *Ecological*  
619 *Genomics*. Springer Netherlands.
- 620 30. Ferrer-Admetlla A, Liang M, Korneliussen T, Nielsen R. 2014. On Detecting  
621 Incomplete Soft or Hard Selective Sweeps Using Haplotype Structure. *Mol Biol*  
622 *Evol* 31:1275–1291.
- 623 31. Hell W, Meyer H-GW, Gatermann SG. 1998. Cloning of *aas*, a gene encoding a  
624 *Staphylococcus saprophyticus* surface protein with adhesive and autolytic  
625 properties. *Mol Microbiol* 29:871–881.
- 626 32. Gatermann S, Meyer HG. 1994. *Staphylococcus saprophyticus* hemagglutinin  
627 binds fibronectin. *Infect Immun* 62:4556–4563.
- 628 33. Kohler TP, Gisch N, Binsker U, Schlag M, Darm K, Völker U, Zähringer U,  
629 Hammerschmidt S. 2014. Repeating Structures of the Major Staphylococcal  
630 Autolysin Are Essential for the Interaction with Human Thrombospondin 1 and  
631 Vitronectin. *J Biol Chem* 289:4070–4082.
- 632 34. Zoll S, Schlag M, Shkumatov AV, Rautenberg M, Svergun DI, Götz F, Stehle T.  
633 2012. Ligand-Binding Properties and Conformational Dynamics of Autolysin  
634 Repeat Domains in Staphylococcal Cell Wall Recognition. *J Bacteriol* 194:3789–  
635 3802.
- 636 35. He M, Sebahia M, Lawley TD, Stabler RA, Dawson LF, Martin MJ, Holt KE, Seth-  
637 Smith HMB, Quail MA, Rance R, Brooks K, Churcher C, Harris D, Bentley SD,

- 638 Burrows C, Clark L, Corton C, Murray V, Rose G, Thurston S, Tonder A van,  
639 Walker D, Wren BW, Dougan G, Parkhill J. 2010. Evolutionary dynamics of  
640 *Clostridium difficile* over short and long time scales. *Proc Natl Acad Sci* 107:7527–  
641 7532.
- 642 36. Nübel U, Dordel J, Kurt K, Strommenger B, Westh H, Shukla SK, Žemličková H,  
643 Leblois R, Wirth T, Jombart T, Balloux F, Witte W. 2010. A Timescale for Evolution,  
644 Population Expansion, and Spatial Spread of an Emerging Clone of Methicillin-  
645 Resistant *Staphylococcus aureus*. *PLOS Pathog* 6:e1000855.
- 646 37. Pepperell CS, Casto AM, Kitchen A, Granka JM, Cornejo OE, Holmes EC, Birren  
647 B, Galagan J, Feldman MW. 2013. The Role of Selection in Shaping Diversity of  
648 Natural *M. tuberculosis* Populations. *PLoS Pathog* 9:e1003543.
- 649 38. Davies MR, Holden MT, Coupland P, Chen JHK, Venturini C, Barnett TC, Zakour  
650 NLB, Tse H, Dougan G, Yuen K-Y, Walker MJ. 2015. Emergence of scarlet fever  
651 *Streptococcus pyogenes* emm12 clones in Hong Kong is associated with toxin  
652 acquisition and multidrug resistance. *Nat Genet* 47:84–87.
- 653 39. Gutenkunst RN, Hernandez RD, Williamson SH, Bustamante CD. 2009. Inferring  
654 the Joint Demographic History of Multiple Populations from Multidimensional SNP  
655 Frequency Data. *PLoS Genet* 5:e1000695.
- 656 40. Lapierre M, Blin C, Lambert A, Achaz G, Rocha EPC. 2016. The impact of  
657 selection, gene conversion, and biased sampling on the assessment of microbial  
658 demography. *Mol Biol Evol* msw048.
- 659 41. Brown T, Didelot X, Wilson DJ, De Maio N. 2016. SimBac: simulation of whole  
660 bacterial genomes with homologous recombination. *Microb Genomics* 2.
- 661 42. Mostowy R, Croucher NJ, Andam CP, Corander J, Hanage WP, Marttinen P. 2016.  
662 Analysis of recent and ancestral recombination reveals high-resolution population  
663 structure in *Streptococcus pneumoniae*. *bioRxiv* 059642.

- 664 43. Coffman AJ, Hsieh PH, Gravel S, Gutenkunst RN. 2016. Computationally Efficient  
665 Composite Likelihood Statistics for Demographic Inference. *Mol Biol Evol* 33:591–  
666 593.
- 667 44. Hernandez RD. 2008. A flexible forward simulator for populations subject to  
668 selection and demography. *Bioinformatics* 24:2786–2787.
- 669 45. Neher RA, Hallatschek O. 2013. Genealogies of rapidly adapting populations. *Proc*  
670 *Natl Acad Sci* 110:437–442.
- 671 46. Widerstrom M, Wistrom J, Ferry S, Karlsson C, Monsen T. 2007. Molecular  
672 Epidemiology of *Staphylococcus saprophyticus* Isolated from Women with  
673 Uncomplicated Community-Acquired Urinary Tract Infection. *J Clin Microbiol*  
674 45:1561–1564.
- 675 47. Hedman P, Ringertz O, Lindström M, Olsson K. 1993. The origin of  
676 *Staphylococcus saprophyticus* from cattle and pigs. *Scand J Infect Dis* 25:57–60.
- 677 48. Kastman EK, Kamelamela N, Norville JW, Cosetta CM, Dutton RJ, Wolfe BE.  
678 2016. Biotic Interactions Shape the Ecological Distributions of *Staphylococcus*  
679 *Species*. *mBio* 7:e01157-16.
- 680 49. Tajima F. 1989. Statistical method for testing the neutral mutation hypothesis by  
681 DNA polymorphism. *Genetics* 123:585–595.
- 682 50. Shapiro BJ, David LA, Friedman J, Alm EJ. 2009. Looking for Darwin’s footprints in  
683 the microbial world. *Trends Microbiol* 17:196–204.
- 684 51. Holt KE, Nga TVT, Thanh DP, Vinh H, Kim DW, Tra MPV, Campbell JI, Hoang  
685 NVM, Vinh NT, Minh PV, Thuy CT, Nga TTT, Thompson C, Dung TTN, Nhu NTK,  
686 Vinh PV, Tuyet PTN, Phuc HL, Lien NTN, Phu BD, Ai NTT, Tien NM, Dong N,  
687 Parry CM, Hien TT, Farrar JJ, Parkhill J, Dougan G, Thomson NR, Baker S. 2013.  
688 Tracking the establishment of local endemic populations of an emergent enteric  
689 pathogen. *Proc Natl Acad Sci* 110:17522–17527.

- 690 52. Caballero JD, Clark ST, Coburn B, Zhang Y, Wang PW, Donaldson SL, Tullis DE,  
691 Yau YCW, Waters VJ, Hwang DM, Guttman DS. 2015. Selective Sweeps and  
692 Parallel Pathoadaptation Drive *Pseudomonas aeruginosa* Evolution in the Cystic  
693 Fibrosis Lung. *mBio* 6:e00981-15.
- 694 53. Bendall ML, Stevens SL, Chan L-K, Malfatti S, Schwientek P, Tremblay J,  
695 Schackwitz W, Martin J, Pati A, Bushnell B, Froula J, Kang D, Tringe SG,  
696 Bertilsson S, Moran MA, Shade A, Newton RJ, McMahon KD, Malmstrom RR.  
697 2016. Genome-wide selective sweeps and gene-specific sweeps in natural  
698 bacterial populations. *ISME J* 10:1589–1601.
- 699 54. Shapiro BJ, Friedman J, Cordero OX, Preheim SP, Timberlake SC, Szabó G, Polz  
700 MF, Alm EJ. 2012. Population Genomics of Early Events in the Ecological  
701 Differentiation of Bacteria. *Science* 336:48–51.
- 702 55. Bao Y-J, Shapiro BJ, Lee SW, Ploplis VA, Castellino FJ. 2016. Phenotypic  
703 differentiation of *Streptococcus pyogenes* populations is induced by recombination-  
704 driven gene-specific sweeps. *Sci Rep* 6:36644.
- 705 56. Viana D, Comos M, McAdam PR, Ward MJ, Selva L, Guinane CM, González-  
706 Muñoz BM, Tristan A, Foster SJ, Fitzgerald JR, Penadés JR. 2015. A single natural  
707 nucleotide mutation alters bacterial pathogen host tropism. *Nat Genet* advance  
708 online publication.
- 709 57. Vitti JJ, Grossman SR, Sabeti PC. 2013. Detecting Natural Selection in Genomic  
710 Data. *Annu Rev Genet* 47:97–120.
- 711 58. Schlamp F, van der Made J, Stambler R, Chesebrough L, Boyko AR, Messer PW.  
712 2016. Evaluating the performance of selection scans to detect selective sweeps in  
713 domestic dogs. *Mol Ecol* 25:342–356.
- 714 59. Meyer H-GW, Müthing J, Gatermann SG. 1997. The hemagglutinin of  
715 *Staphylococcus saprophyticus* binds to a protein receptor on sheep erythrocytes.  
716 *Med Microbiol Immunol (Berl)* 186:37–43.



- 717 60. Flores-Mireles AL, Walker JN, Caparon M, Hultgren SJ. 2015. Urinary tract  
718 infections: epidemiology, mechanisms of infection and treatment options. *Nat Rev*  
719 *Microbiol* advance online publication.
- 720 61. King NP, Beatson SA, Totsika M, Ulett GC, Alm RA, Manning PA, Schembri MA.  
721 2011. UafB is a serine-rich repeat adhesin of *Staphylococcus saprophyticus* that  
722 mediates binding to fibronectin, fibrinogen and human uroepithelial cells.  
723 *Microbiology* 157:1161–1175.
- 724 62. Torelli R, Serror P, Bugli F, Sterbini FP, Florio AR, Stringaro A, Colone M, Carolis  
725 ED, Martini C, Giard J-C, Sanguinetti M, Posteraro B. 2012. The PavA-like  
726 Fibronectin-Binding Protein of *Enterococcus faecalis*, EfbA, Is Important for  
727 Virulence in a Mouse Model of Ascending Urinary Tract Infection. *J Infect Dis*  
728 206:952–960.
- 729 63. Wright KJ, Hultgren SJ. 2006. Sticky fibers and uropathogenesis: bacterial  
730 adhesins in the urinary tract. *Future Microbiol* 1:75–87.
- 731 64. Chen SL, Hung C-S, Xu J, Reigstad CS, Magrini V, Sabo A, Blasiar D, Bieri T,  
732 Meyer RR, Ozersky P, Armstrong JR, Fulton RS, Latreille JP, Spieth J, Hooton TM,  
733 Mardis ER, Hultgren SJ, Gordon JI. 2006. Identification of genes subject to positive  
734 selection in uropathogenic strains of *Escherichia coli*: A comparative genomics  
735 approach. *Proc Natl Acad Sci* 103:5977–5982.
- 736 65. Chen SL, Hung CS, Pinkner JS, Walker JN, Cusumano CK, Li Z, Bouckaert J,  
737 Gordon JI, Hultgren SJ. 2009. Positive selection identifies an in vivo role for FimH  
738 during urinary tract infection in addition to mannose binding. *Proc Natl Acad Sci*  
739 106:22439–22444.
- 740 66. Schwartz DJ, Kalas V, Pinkner JS, Chen SL, Spaulding CN, Dodson KW, Hultgren  
741 SJ. 2013. Positively selected FimH residues enhance virulence during urinary tract  
742 infection by altering FimH conformation. *Proc Natl Acad Sci* 110:15530–15537.

- 743 67. Yakovenko O, Sharma S, Forero M, Tchesnokova V, Aprikian P, Kidd B, Mach A,  
744 Vogel V, Sokurenko E, Thomas WE. 2008. FimH Forms Catch Bonds That Are  
745 Enhanced by Mechanical Force Due to Allosteric Regulation. *J Biol Chem*  
746 283:11596–11605.
- 747 68. Niddam AF, Ebady R, Bansal A, Koehler A, Hinz B, Moriarty TJ. 2017. Plasma  
748 fibronectin stabilizes *Borrelia burgdorferi*–endothelial interactions under vascular  
749 shear stress by a catch-bond mechanism. *Proc Natl Acad Sci* 114:E3490–E3498.
- 750 69. Messina JA, Thaden JT, Sharma-Kuinkel BK, Jr VGF. 2016. Impact of Bacterial  
751 and Human Genetic Variation on *Staphylococcus aureus* Infections. *PLOS Pathog*  
752 12:e1005330.
- 753 70. Da Cunha V, Davies MR, Douarre P-E, Rosinski-Chupin I, Margarit I, Spinali S,  
754 Perkins T, Lechat P, Dmytruk N, Sauvage E, Ma L, Romi B, Tichit M, Lopez-  
755 Sanchez M-J, Descorps-Declere S, Souche E, Buchrieser C, Trieu-Cuot P, Moszer  
756 I, Clermont D, Maione D, Bouchier C, McMillan DJ, Parkhill J, Telford JL, Dougan  
757 G, Walker MJ, Devani Consortium, Holden MTG, Poyart C, Glaser P. 2014.  
758 *Streptococcus agalactiae* clones infecting humans were selected and fixed through  
759 the extensive use of tetracycline. *Nat Commun* 5.
- 760 71. Hedge J, Wilson DJ. 2014. Bacterial Phylogenetic Reconstruction from Whole  
761 Genomes Is Robust to Recombination but Demographic Inference Is Not. *mBio*  
762 5:e02158-14.
- 763 72. Baym M, Kryazhimskiy S, Lieberman TD, Chung H, Desai MM, Kishony R. 2015.  
764 Inexpensive Multiplexed Library Preparation for Megabase-Sized Genomes. *PLOS*  
765 *ONE* 10:e0128036.
- 766 73. Li H. 2013. Aligning sequence reads, clone sequences and assembly contigs with  
767 BWA-MEM. 1303.3997. arXiv e-print.

- 768 74. Li H, Handsaker B, Wysoker A, Fennell T, Ruan J, Homer N, Marth G, Abecasis G,  
769 Durbin R. 2009. The Sequence Alignment/Map format and SAMtools.  
770 *Bioinformatics* 25:2078–2079.
- 771 75. DePristo MA, Banks E, Poplin R, Garimella KV, Maguire JR, Hartl C, Philippakis  
772 AA, del Angel G, Rivas MA, Hanna M, McKenna A, Fennell TJ, Kernysky AM,  
773 Sivachenko AY, Cibulskis K, Gabriel SB, Altshuler D, Daly MJ. 2011. A framework  
774 for variation discovery and genotyping using next-generation DNA sequencing  
775 data. *Nat Genet* 43:491–498.
- 776 76. Walker BJ, Abeel T, Shea T, Priest M, Abouelliel A, Sakthikumar S, Cuomo CA,  
777 Zeng Q, Wortman J, Young SK, Earl AM. 2014. Pilon: An Integrated Tool for  
778 Comprehensive Microbial Variant Detection and Genome Assembly Improvement.  
779 *PLOS ONE* 9:e112963.
- 780 77. Koren S, Treangen TJ, Hill CM, Pop M, Phillippy AM. 2014. Automated ensemble  
781 assembly and validation of microbial genomes. *BMC Bioinformatics* 15:126.
- 782 78. Bankevich A, Nurk S, Antipov D, Gurevich AA, Dvorkin M, Kulikov AS, Lesin VM,  
783 Nikolenko SI, Pham S, Pribelski AD, Pyshkin AV, Sirotkin AV, Vyahhi N, Tesler G,  
784 Alekseyev MA, Pevzner PA. 2012. SPAdes: A New Genome Assembly Algorithm  
785 and Its Applications to Single-Cell Sequencing. *J Comput Biol* 19:455–477.
- 786 79. Zimin A, Marçais G, Puiu D, Roberts M, Salzberg SL, Yorke JA. 2013. The  
787 MaSuRCA genome Assembler. *Bioinformatics* btt476.
- 788 80. Zerbino DR, Birney E. 2008. Velvet: Algorithms for de novo short read assembly  
789 using de Bruijn graphs. *Genome Res* 18:821–829.
- 790 81. Chikhi R, Medvedev P. 2014. Informed and automated k-mer size selection for  
791 genome assembly. *Bioinformatics* 30:31–37.
- 792 82. Gurevich A, Saveliev V, Vyahhi N, Tesler G. 2013. QUAST: quality assessment  
793 tool for genome assemblies. *Bioinforma Oxf Engl* 29:1072–1075.

- 794 83. Hunt M, Kikuchi T, Sanders M, Newbold C, Berriman M, Otto TD. 2013. REAPR: a  
795 universal tool for genome assembly evaluation. *Genome Biol* 14:R47.
- 796 84. Ghodsi M, Hill CM, Astrovskaya I, Lin H, Sommer DD, Koren S, Pop M. 2013. De  
797 novo likelihood-based measures for comparing genome assemblies. *BMC Res*  
798 *Notes* 6:334.
- 799 85. Clark SC, Egan R, Frazier PI, Wang Z. 2013. ALE: a generic assembly likelihood  
800 evaluation framework for assessing the accuracy of genome and metagenome  
801 assemblies. *Bioinformatics* 29:435–443.
- 802 86. Garrison E, Marth G. 2012. Haplotype-based variant detection from short-read  
803 sequencing. *ArXiv12073907 Q-Bio*.
- 804 87. Rahman A, Pachter L. 2013. CGAL: computing genome assembly likelihoods.  
805 *Genome Biol* 14:R8.
- 806 88. Wood DE, Salzberg SL. 2014. Kraken: ultrafast metagenomic sequence  
807 classification using exact alignments. *Genome Biol* 15:R46.
- 808 89. Seemann T. 2014. Prokka: rapid prokaryotic genome annotation. *Bioinformatics*  
809 *btu153*.
- 810 90. Page AJ, Cummins CA, Hunt M, Wong VK, Reuter S, Holden MTG, Fookes M,  
811 Falush D, Keane JA, Parkhill J. 2015. Roary: rapid large-scale prokaryote pan  
812 genome analysis. *Bioinformatics* 31:3691–3693.
- 813 91. Angiuoli SV, Salzberg SL. 2011. Mugsy: fast multiple alignment of closely related  
814 whole genomes. *Bioinformatics* 27:334–342.
- 815 92. Stamatakis A. 2014. RAxML version 8: a tool for phylogenetic analysis and post-  
816 analysis of large phylogenies. *Bioinformatics* 30:1312–1313.

- 817 93. Yu G, Smith DK, Zhu H, Guan Y, Lam TT-Y. 2016. ggtree: an R package for  
818 visualization and annotation of phylogenetic trees with their covariates and other  
819 associated data. *Methods Ecol Evol* n/a-n/a.
- 820 94. Mita SD, Siol M. 2012. EggLib: processing, analysis and simulation tools for  
821 population genetics and genomics. *BMC Genet* 13:27.
- 822 95. Szpiech ZA, Hernandez RD. 2014. selscan: An Efficient Multithreaded Program to  
823 Perform EHH-Based Scans for Positive Selection. *Mol Biol Evol* 31:2824–2827.
- 824 96. Krzywinski M, Schein J, Birol I, Connors J, Gascoyne R, Horsman D, Jones SJ,  
825 Marra MA. 2009. Circos: An information aesthetic for comparative genomics.  
826 *Genome Res* 19:1639–1645.
- 827 97. Page AJ, Taylor B, Delaney AJ, Soares J, Seemann T, Keane JA, Harris SR. 2016.  
828 SNP-sites: rapid efficient extraction of SNPs from multi-FASTA alignments.  
829 [biorxiv;038190v1](https://doi.org/10.1101/038190).
- 830 98. Cingolani P, Platts A, Wang LL, Coon M, Nguyen T, Wang L, Land SJ, Lu X,  
831 Ruden DM. 2012. A program for annotating and predicting the effects of single  
832 nucleotide polymorphisms, SnpEff. *Fly (Austin)* 6:80–92.
- 833 99. Sagulenko P, Puller V, Neher R. 2017. TreeTime: maximum likelihood  
834 phylodynamic analysis. [bioRxiv 153494](https://doi.org/10.1101/153494).
- 835 100. Maurer LM, Tomasini-Johansson BR, Mosher DF. 2010. Emerging roles of  
836 fibronectin in thrombosis. *Thromb Res* 125:287–291.
- 837 101. Annis DS, Murphy-Ullrich JE, Mosher DF. 2006. Function-blocking  
838 antithrombospondin-1 monoclonal antibodies. *J Thromb Haemost* 4:459–468.
- 839
- 840

841 **Table 1. Single nucleotide polymorphisms with  $F_{ST}$  values in the top 0.05%**  
 842 **between 1,760,000 and 1,820,000 bp in ATCC 15305.**

| Position | Frequency in human associated isolates | Frequency in non-human associated isolates | $F_{ST}$ Value | Type           |
|----------|----------------------------------------|--------------------------------------------|----------------|----------------|
| 1772616  | 0.72                                   | 0.16                                       | 0.5            | Non-synonymous |
| 1797190  | 0.9                                    | 0.37                                       | 0.48           | Synonymous     |
| 1808274  | 0.8                                    | 0.21                                       | 0.52           | Synonymous     |
| 1811585  | 0.72                                   | 0.16                                       | 0.5            | Synonymous     |
| 1811777  | 0.9                                    | 0.37                                       | 0.48           | Non-synonymous |
| 1813204  | 0.74                                   | 0.16                                       | 0.53           | Synonymous     |
| 1816895  | 0.77                                   | 0.05                                       | 0.71           | Non-synonymous |
| 1818150  | 0.77                                   | 0.16                                       | 0.56           | Intergenic     |
| 1818151  | 0.77                                   | 0.16                                       | 0.56           | Intergenic     |
| 1818156  | 0.77                                   | 0.16                                       | 0.56           | Intergenic     |

843

844 **Table 2. Results of demographic inference.**  $v = N_e/N_{ancestral}$ ,  $\tau = \text{generations}/N_{ancestral}$

| Model                                               | Optimized parameters (standard deviation)                                                                                                                                                                                              | Log Likelihood | p-value (comparison model)                     |
|-----------------------------------------------------|----------------------------------------------------------------------------------------------------------------------------------------------------------------------------------------------------------------------------------------|----------------|------------------------------------------------|
| constant size                                       |                                                                                                                                                                                                                                        | -562           |                                                |
| instantaneous change                                | $v$ : $9.9 \times 10^4$ ( $6.0 \times 10^4$ )<br>$\tau$ : $4.4 \times 10^{-2}$ ( $4.7 \times 10^{-3}$ )                                                                                                                                | -455           | 0.0<br>(constant size)                         |
| exponential change                                  | $v$ : $9.7 \times 10^4$ ( $9.8 \times 10^4$ )<br>$\tau$ : $4.1 \times 10^{-2}$ ( $4.9 \times 10^{-3}$ )                                                                                                                                | -455           | 0.0<br>(constant size)                         |
| instantaneous change followed by exponential change | $v_A$ : $2.1 \times 10^{-2}$ ( $2.9 \times 10^{-2}$ )<br>$v_B$ : 1.1 ( $3.9 \times 10^{-2}$ )<br>$\tau$ : $1.3 \times 10^{-1}$ ( $1.6 \times 10^{-1}$ )                                                                                | -404           | $1.6 \times 10^{-4}$<br>(exponential change)   |
| two instantaneous size changes                      | $v_A$ : $2.9 \times 10^{-2}$ ( $1.2 \times 10^{-2}$ )<br>$v_B$ : $4.5 \times 10^{-1}$ ( $2.1 \times 10^{-1}$ )<br>$\tau_A$ : $1.2 \times 10^{-1}$ ( $3.4 \times 10^{-2}$ )<br>$\tau_B$ : $3.1 \times 10^{-3}$ ( $5.3 \times 10^{-3}$ ) | -393           | $4.6 \times 10^{-7}$<br>(instantaneous change) |

845

846

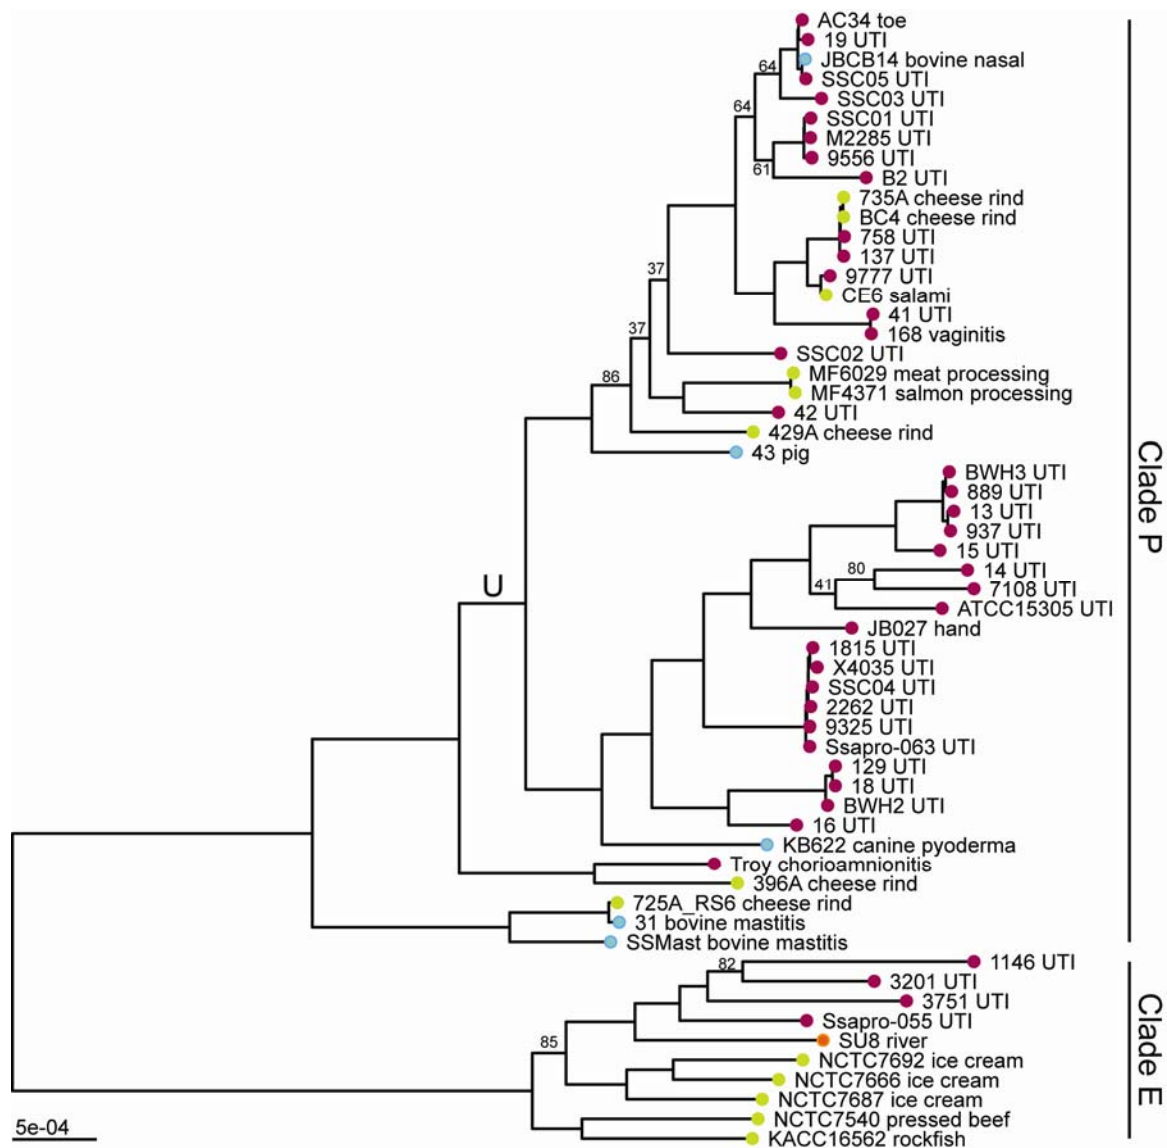

847

848

849

850

851

852

853

854

855

856

**Figure 1. Maximum likelihood phylogeny of *S. saprophyticus*.** Maximum likelihood phylogenetic analysis was performed in RAxML (92) using a whole genome alignment with repetitive regions masked. The phylogeny is midpoint rooted, and nodes with bootstrap values less than 90 are labelled. Branch lengths are scaled by substitutions per site. Tips are colored based on the isolation source (pink- human, blue- animal, green- food, orange- environment). Tips are labeled with isolate name and detailed source information. *S. saprophyticus* contains two major clades (Clade P and Clade E). Within Clade P, there is a lineage enriched in human pathogenic isolates (lineage U, branch labeled 'U').



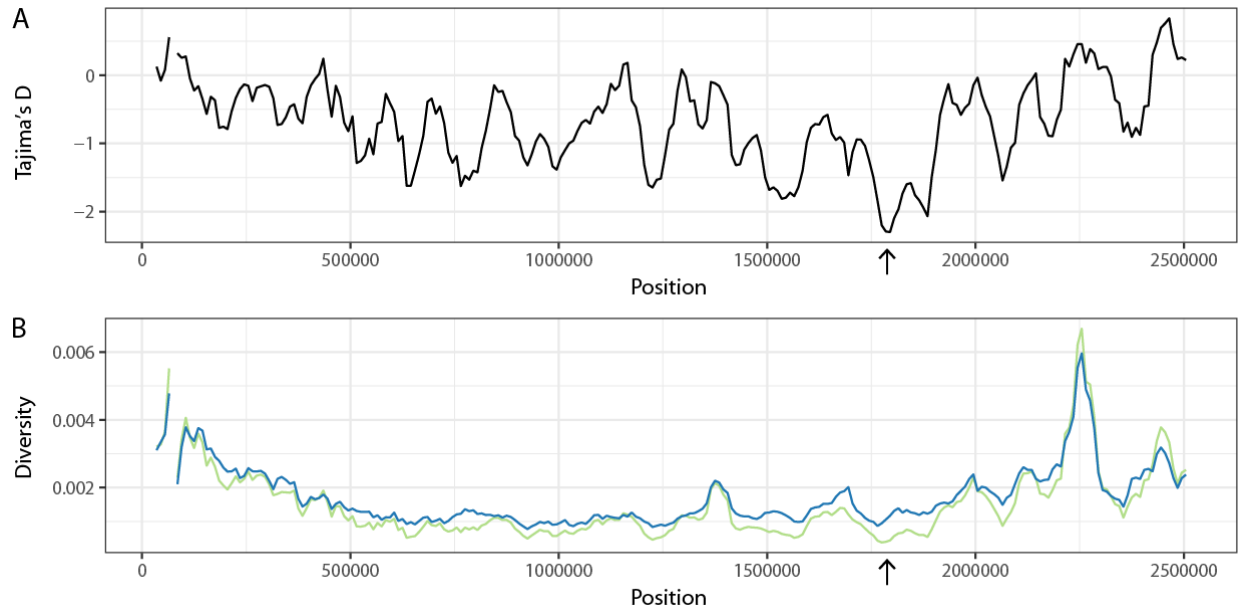

857  
858 **Figure 2. Sliding window analysis of diversity and neutrality statistics.** Population  
859 genetic statistics were calculated for lineage U using EggLib (94). Windows were 50 kb  
860 in width with a step size of 10 kb. A) Tajima's D. B)  $\pi$  (green) and  $\theta$  (blue). The lowest  
861 values for Tajima's D and  $\pi$  are found in the same window (1,760,000-1,820,000 bp,  
862 arrow).

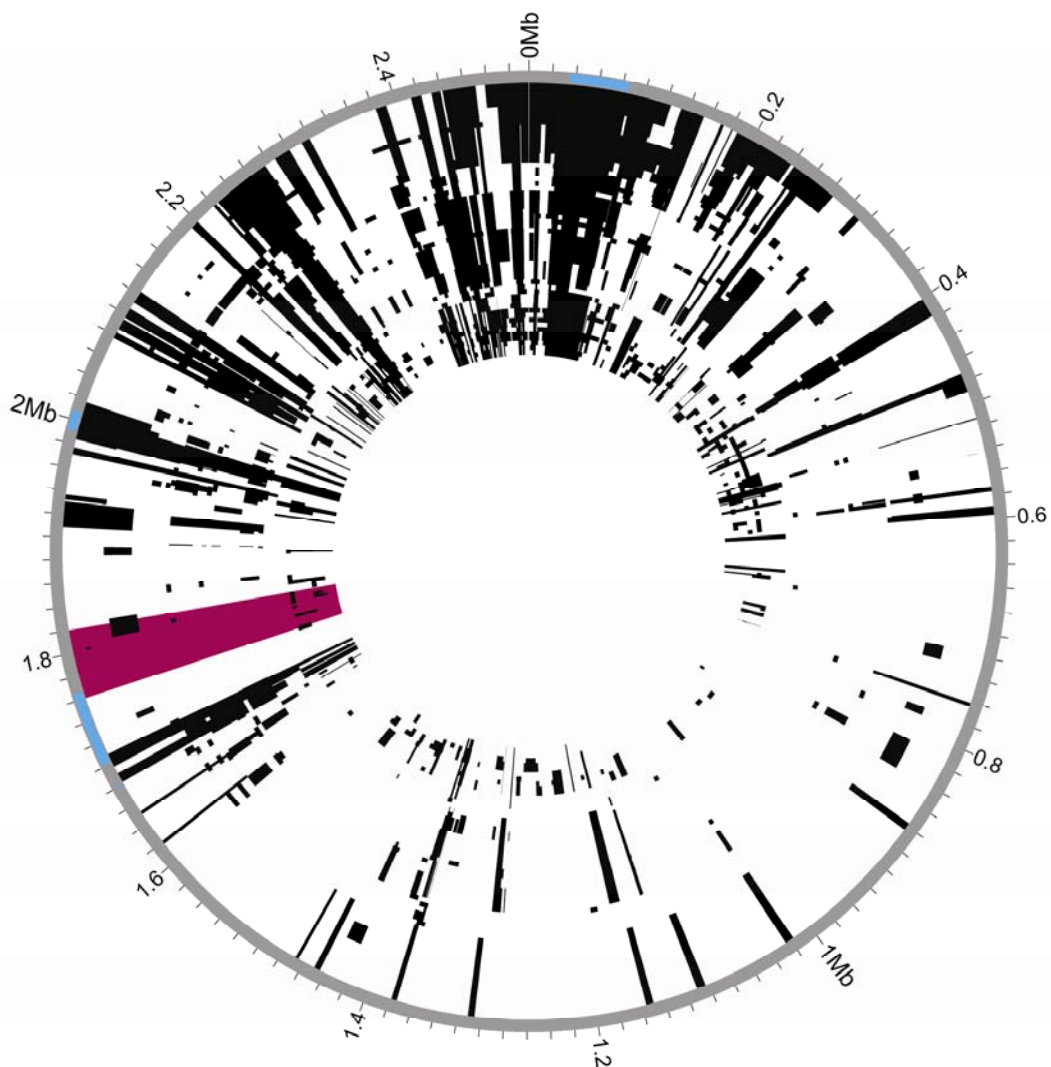

863  
864 **Figure 3. Recombination in *S. saprophyticus*.** Recombinant regions in the whole  
865 genome alignment of *S. saprophyticus* were identified using Gubbins (20). Mobile  
866 genetic elements are highlighted in blue on the outer rim. The window with low Tajima's  
867 D and  $\pi$  is highlighted in pink. Few recombination events are inferred within this region.

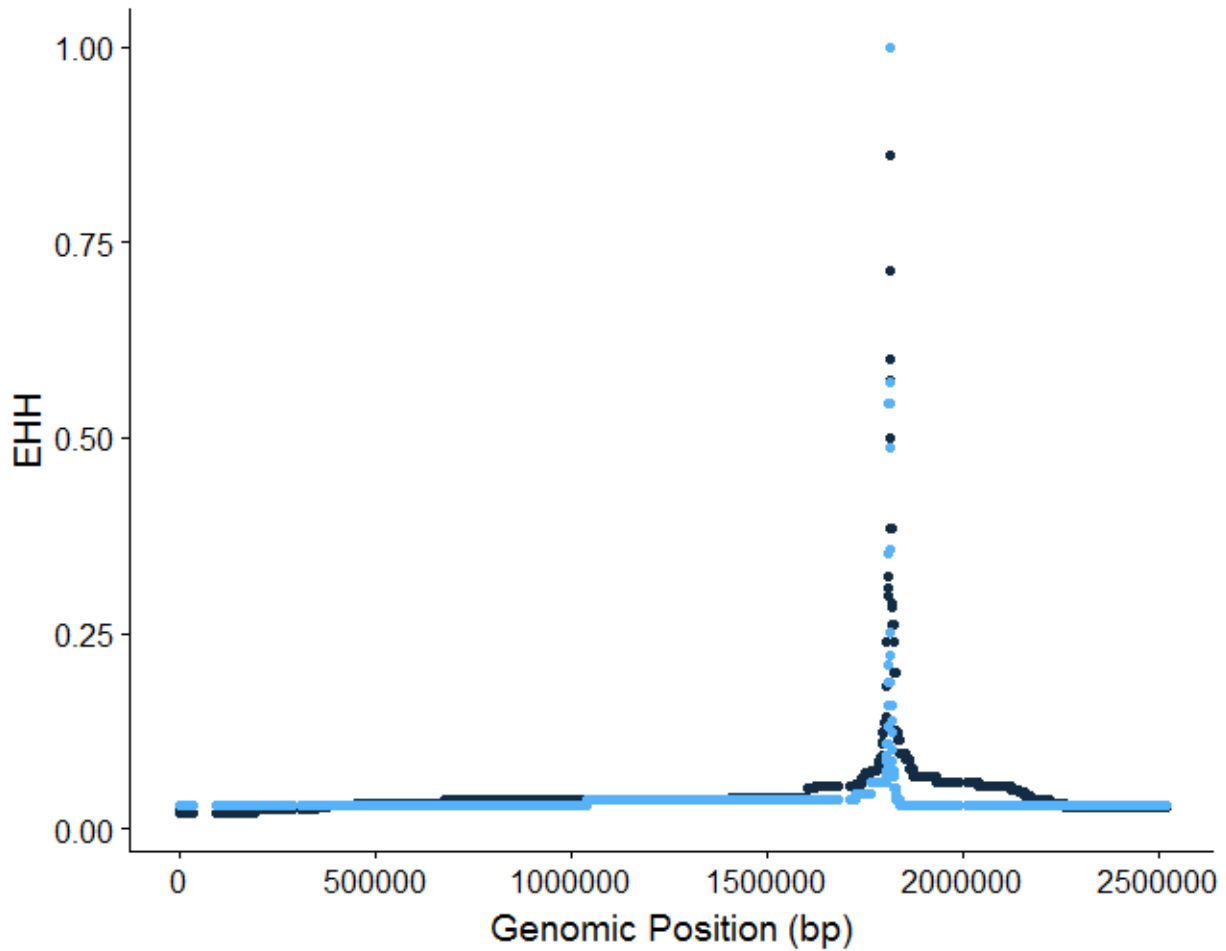

868  
869 **Figure 4.** Extended Haplotype Homozygosity (EHH) of single nucleotide polymorphism  
870 at position 1811777. EHH values for the ancestral allele are in light blue. EHH values for  
871 the derived allele are in dark blue.

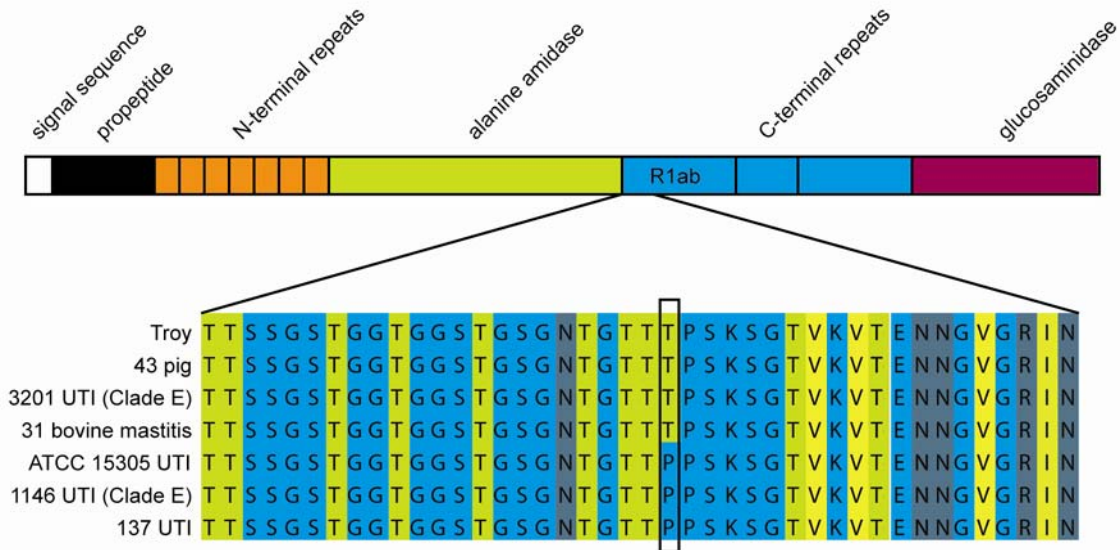

872  
873 **Figure 5. Non-synonymous variant in Aas fibronectin binding repeat.** Top-  
874 Domains of Aas protein adapted from Hell et al. 1998. R1ab is the peptide used in the  
875 fibronectin and thrombospondin binding experiments. Bottom- Alignment of a portion of  
876 R1 showing amino acid sequence in Aas from selected *S. saprophyticus* strains.  
877 Amino acids are colored based on their propensity to form beta strands (light  
878 green=high propensity, light blue=low propensity). The alignment visualization was  
879 created in JalView.

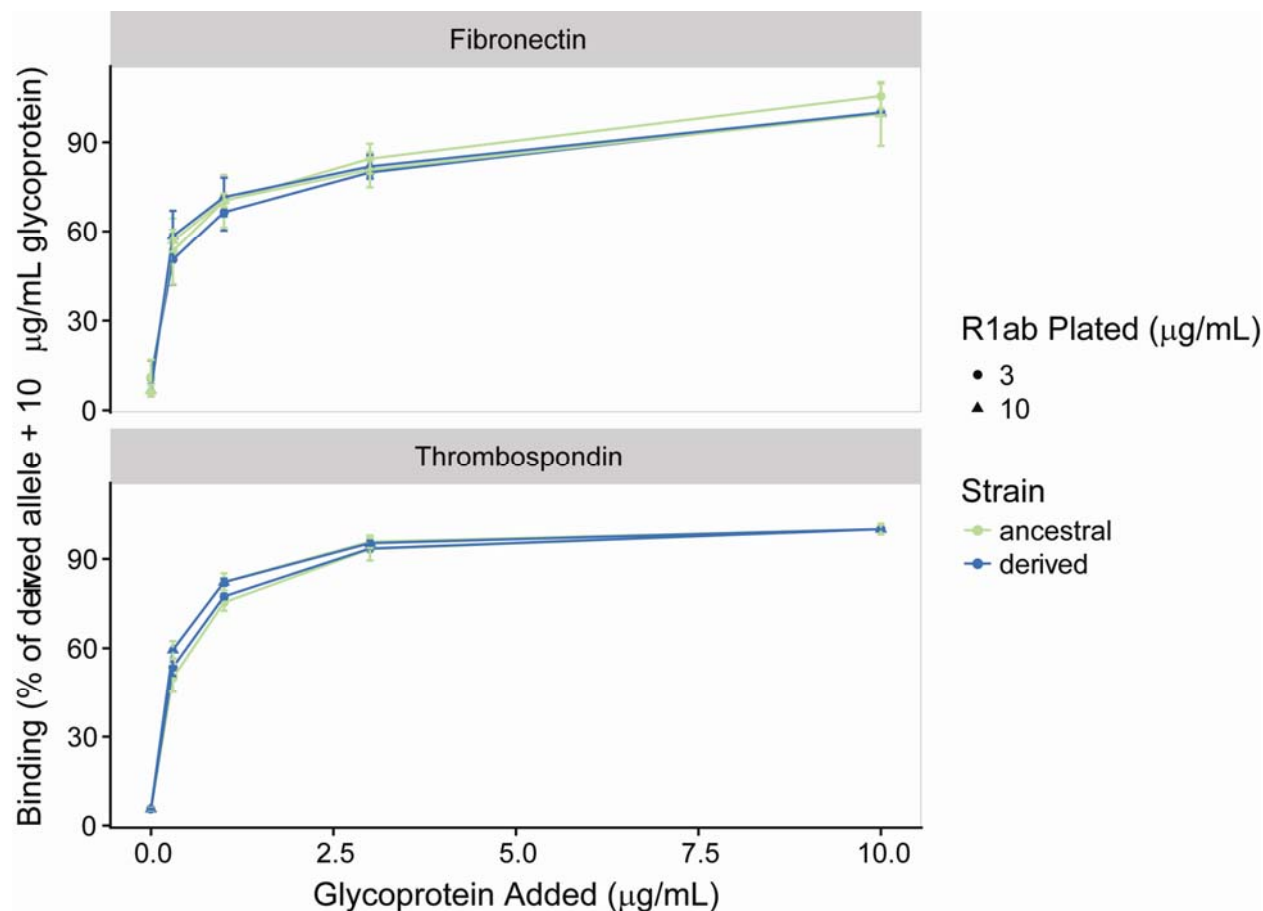

880  
881 **Figure 6. Fibronectin and thrombospondin binding to human-associated and**  
882 **ancestral strain Aas R1ab.** ELISAs detecting the binding of soluble human fibronectin  
883 and thrombospondin to plates coated with Aas R1ab at 3 and 1  $\mu\text{g/mL}$ . Results  
884 normalized to percent of binding of 10 $\mu\text{g/mL}$  glycoprotein to human-associated strain  
885 R1ab. Human and bovine fibronectin and human thrombospondin bound to the two  
886 constructs equally well.

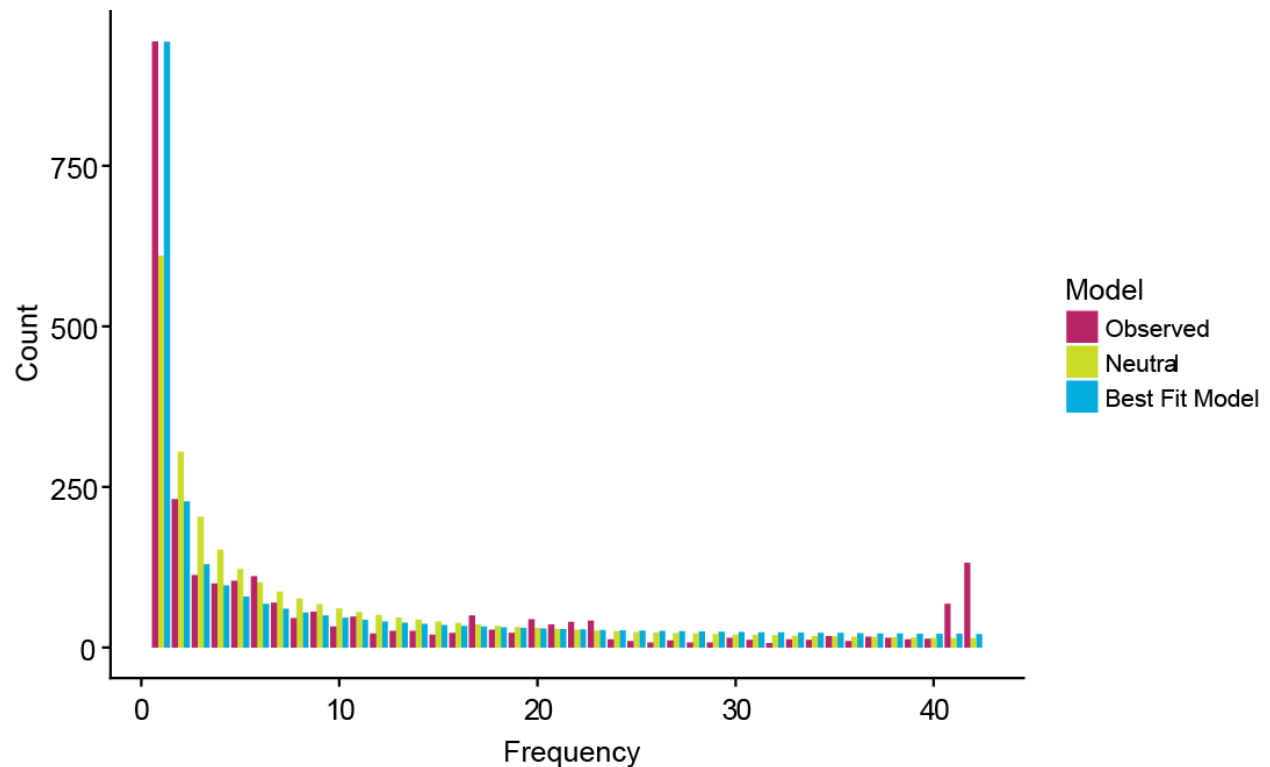

887  
888 **Figure 7. Site frequency spectrum of lineage U.** The ancient genome (Troy) was  
889 used as the outgroup to determine the ancestral state. Synonymous, nonsynonymous,  
890 and intergenic sites were identified with SnpEff (98). The observed synonymous SFS  
891 contain an excess of singletons and high frequency derived variants. Both the observed  
892 SFS and the SFS predicted by the best fitting model have an excess of singletons  
893 compared to the SFS expected under the standard neutral model with no population  
894 size change.

895

896

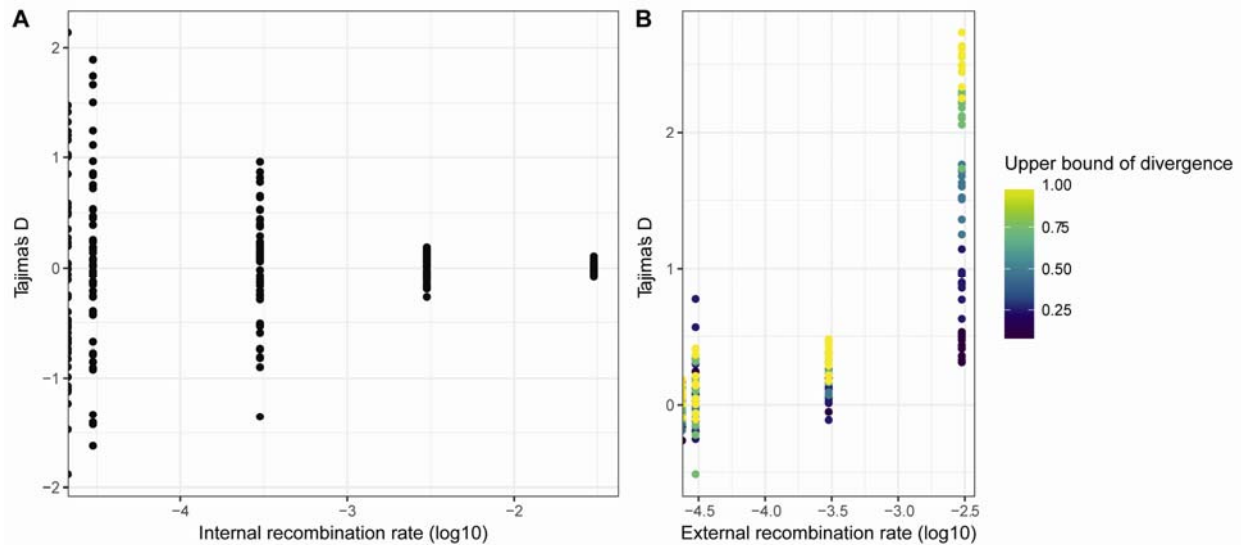

897

898

**Figure 8. Effects of internal and external recombination on Tajima's D.** Bacterial

899 populations with a range of recombination rates were simulated with SimBac. A)

900 Tajima's D values from simulations of internal recombination rates ranging from 0-0.03

901 and no external recombination. B) Tajima's D values from simulations with an internal

902 recombination rate of 0.003 ( $r/m = 1$ ) and external recombination rates ranging from 0-

903 0.003. Points are filled according to the upper limit of diversity in external recombinant

904 fragments.



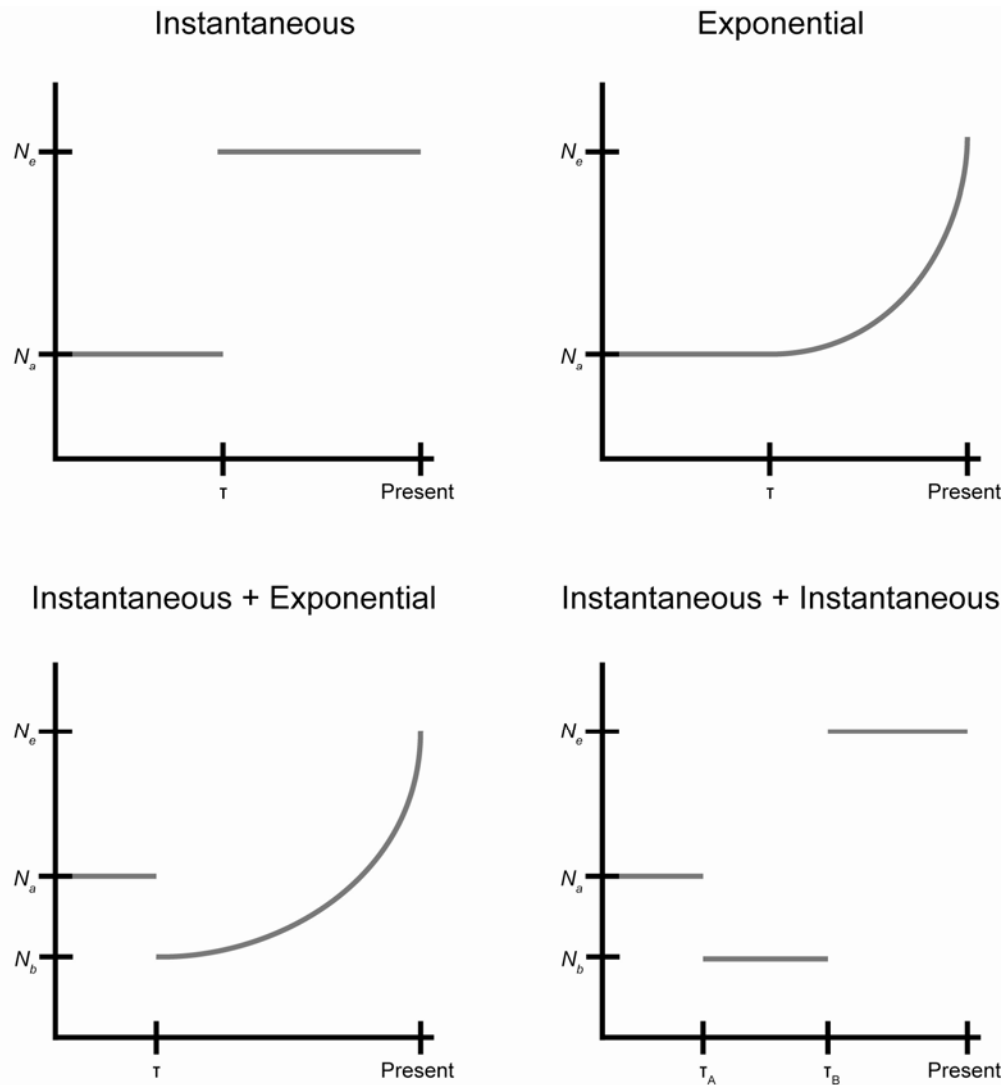

905

906

**Figure 9. Cartoon of fitted demographic models.** The observed synonymous SFS was fit to 5 demographic models including constant size, instantaneous population size change, exponential population size change, instantaneous population size change followed by exponential, and two instantaneous population size changes. Parameters for the instantaneous and exponential models are the magnitude of the population size change ( $v = N_e/N_{ancestral}$ ) and the timing of the change ( $\tau = \text{generations}/N_{ancestral}$ ). For models with two population size changes, magnitudes are reported as  $v_A = N_b/N_{ancestral}$  and  $v_b = N_e/N_{ancestral}$ .

914

915

916

917 **Supplementary Tables:**

918 **Table S1.** Accession numbers for *S. saprophyticus* isolates.

919 **Table S2.** Assembly statistics for *S. saprophyticus* genomes.

920
